# Supplementary material for: Pharmacological Properties of Jaeumgeonbi-Tang on Redox System and Stress-Related Hormones in Chronic Subjective Dizziness: A Randomized, Double-Blind, Parallel-Group, Placebo-Controlled Trial
Source: MDPI journal article supplement (doi:10.3390/ph15111375), 2022-11-09
Supplement: s1 [file s1]

## Supplementary Materials

**Table S1.** Biochemistry test results of subjects after 4 weeks of JGT administrations.

| Variables            | Treatment    | JGT           | Placebo       | Reference range |
|----------------------|--------------|---------------|---------------|-----------------|
| Total protein (g/dL) | Before (all) | 7.31 ± 0.49   | 7.38 ± 0.39   | 6.5 ~ 8.5       |
|                      | 2-30s        | 7.24 ± 0.55   | 7.54 ± 0.39   | 6.5 ~ 8.4       |
|                      | 40s          | 7.25 ± 0.37   | 7.05 ± 0.26   | 6.7 ~ 7.8       |
|                      | 5-60s        | 7.37 ± 0.49   | 7.36 ± 0.33   | 7.0 ~ 8.5       |
|                      | After (all)  | 7.53 ± 0.41   | 7.52 ± 0.37   | 7.0 ~ 8.4       |
|                      | 2-30s        | 7.60 ± 0.42   | 7.52 ± 0.36   | 7.0 ~ 8.3       |
|                      | 40s          | 7.58 ± 0.47   | 7.40 ± 0.34   | 7.0 ~ 8.4       |
|                      | 5-60s        | 7.47 ± 0.32   | 7.56 ± 0.35   | 7.1 ~ 8.0       |
| Albumin (g/dL)       | Before (all) | 4.40 ± 0.29   | 4.50 ± 0.29   | 3.8 ~ 5.0       |
|                      | 2-30s        | 4.38 ± 0.31   | 4.73 ± 0.21   | 4.0 ~ 5.0       |
|                      | 40s          | 4.32 ± 0.18   | 4.10 ± 0.21   | 3.8 ~ 4.5       |
|                      | 5-60s        | 4.46 ± 0.29   | 4.44 ± 0.16   | 4.0 ~ 5.0       |
|                      | After (all)  | 4.49 ± 0.26   | 4.48 ± 0.26   | 4.0 ~ 5.1       |
|                      | 2-30s        | 4.55 ± 0.33   | 4.61 ± 0.25   | 4.0 ~ 5.1       |
|                      | 40s          | 4.45 ± 0.24   | 4.20 ± 0.22   | 3.9 ~ 4.9       |
|                      | 5-60s        | 4.47 ± 0.18   | 4.46 ± 0.18   | 4.2 ~ 4.7       |
| A/G ratio            | Before (all) | 1.54 ± 0.18   | 1.58 ± 0.21   | 1.1 ~ 1.9       |
|                      | 2-30s        | 1.54 ± 0.14   | 1.70 ± 0.15   | 1.3 ~ 1.9       |
|                      | 40s          | 1.50 ± 0.22   | 1.45 ± 0.30   | 1.1 ~ 1.9       |
|                      | 5-60s        | 1.55 ± 0.15   | 1.52 ± 0.13   | 1.3 ~ 1.8       |
|                      | After (all)  | 1.49 ± 0.14   | 1.49 ± 0.24   | 1.0 ~ 1.9       |
|                      | 2-30s        | 1.47 ± 0.15   | 1.61 ± 0.19   | 1.2 ~ 1.9       |
|                      | 40s          | 1.43 ± 0.09   | 1.38 ± 0.30   | 1.0 ~ 1.8       |
|                      | 5-60s        | 1.51 ± 0.13   | 1.42 ± 0.18   | 1.0 ~ 1.7       |
| AST (IU/L)           | Before (all) | 22.17 ± 6.67  | 20.56 ± 5.12  | 13 ~ 38         |
|                      | 2-30s        | 18.42 ± 4.50  | 18.30 ± 2.45  | 13 ~ 28         |
|                      | 40s          | 18.83 ± 2.97  | 18.50 ± 3.64  | 13 ~ 23         |
|                      | 5-60s        | 26.36 ± 6.51  | 23.36 ± 5.73  | 15 ~ 38         |
|                      | After (all)  | 23.50 ± 6.14  | 21.24 ± 4.10  | 15 ~ 38         |
|                      | 2-30s        | 18.57 ± 1.40  | 18.6 ± 2.73   | 15 ~ 23         |
|                      | 40s          | 22.00 ± 4.83  | 19.75 ± 3.30  | 16 ~ 29         |
|                      | 5-60s        | 27.45 ± 5.71  | 24.18 ± 3.27  | 17 ~ 38         |
| ALT (IU/L)           | Before (all) | 16.67 ± 8.91  | 16.08 ± 5.56  | 6 ~ 28          |
|                      | 2-30s        | 12.14 ± 2.47  | 14.5 ± 5.52   | 6 ~ 26          |
|                      | 40s          | 12.17 ± 2.11  | 15.25 ± 4.66  | 9 ~ 22          |
|                      | 5-60s        | 22.00 ± 10.34 | 17.82 ± 5.13  | 10 ~ 28         |
|                      | After (all)  | 18.54 ± 9.85  | 16.92 ± 4.19  | 9 ~ 38          |
|                      | 2-30s        | 13.00 ± 2.39  | 14.60 ± 3.61  | 10 ~ 21         |
|                      | 40s          | 16.33 ± 5.06  | 18.00 ± 2.24  | 11 ~ 26         |
|                      | 5-60s        | 23.27 ± 11.85 | 18.63 ± 4.05  | 12 ~ 38         |
| ALP (IU/L)           | Before (all) | 60.13 ± 18.61 | 57.76 ± 14.49 | 26 ~ 107        |
|                      | 2-30s        | 55.57 ± 10.08 | 52.90 ± 8.62  | 43 ~ 73         |
|                      | 40s          | 49.66 ± 18.61 | 49.00 ± 5.61  | 26 ~ 87         |
|                      | 5-60s        | 68.73 ± 17.99 | 65.27 ± 16.48 | 37 ~ 107        |
|                      | After (all)  | 62.46 ± 18.43 | 57.60 ± 15.56 | 30 ~ 105        |
|                      | 2-30s        | 57.90 ± 6.06  | 51.30 ± 6.39  | 43 ~ 64         |
|                      | 40s          | 55.33 ± 23.74 | 49.00 ± 5.61  | 30 ~ 105        |
|                      | 5-60s        | 19.91 ± 14.77 | 22.36 ± 19.13 | 33 ~ 103        |
| γ-GTP (IU/L)         | Before (all) | 16.54 ± 11.22 | 19.24 ± 16.24 | 7 ~ 80          |
|                      | 2-30s        | 14.29 ± 5.90  | 18.30 ± 14.14 | 7 ~ 58          |

|                           |              |                 |                |             |
|---------------------------|--------------|-----------------|----------------|-------------|
|                           | 40s          | 13.00 ± 1.63    | 13.00 ± 3.08   | 10 ~ 17     |
|                           | 5-60s        | 19.91 ± 14.77   | 22.36 ± 19.13  | 9 ~ 80      |
| Total Cholesterol (mg/dL) | After (all)  | 18.87 ± 11.38   | 19.68 ± 14.92  | 8 ~ 74      |
|                           | 2-30s        | 16.14 ± 6.79    | 18.80 ± 13.01  | 8 ~ 54      |
|                           | 40s          | 15.00 ± 6.81    | 14.75 ± 5.12   | 10 ~ 30     |
|                           | 5-60s        | 22.73 ± 17.73   | 22.27 ± 17.50  | 10 ~ 74     |
|                           | Before (all) | 199.29 ± 42.11  | 185.36 ± 31.86 | 129 ~ 243   |
|                           | 2-30s        | 172.86 ± 22.82  | 171.00 ± 23.96 | 129 ~ 209   |
|                           | 40s          | 184.50 ± 19.92  | 177.00 ± 18.32 | 146 ~ 204   |
|                           | 5-60s        | 224.18 ± 44.46  | 201.45 ± 33.16 | 139 ~ 243   |
| Triglyceride (mg/dL)      | After (all)  | 209.42 ± 49.79  | 180.76 ± 26.73 | 133 ~ 259   |
|                           | 2-30s        | 195.86 ± 41.40  | 167.30 ± 18.36 | 140 ~ 259   |
|                           | 40s          | 191.33 ± 18.34  | 163.00 ± 16.34 | 136 ~ 221   |
|                           | 5-60s        | 227.90 ± 57.20  | 199.45 ± 22.95 | 154 ~ 247   |
|                           | Before (all) | 120.92 ± 134.28 | 104.76 ± 49.74 | 33 ~ 256    |
|                           | 2-30s        | 71.14 ± 21.13   | 86.00 ± 26.44  | 41 ~ 121    |
|                           | 40s          | 85.33 ± 22.51   | 100.00 ± 30.62 | 51 ~ 132    |
|                           | 5-60s        | 172.00 ± 179.62 | 124.45 ± 60.58 | 33 ~ 256    |
| Glucose (mg/dL)           | After (all)  | 114.17 ± 82.67  | 107.24 ± 51.48 | 42 ~ 212    |
|                           | 2-30s        | 72.14 ± 18.51   | 83.90 ± 29.48  | 44 ~ 133    |
|                           | 40s          | 90.67 ± 16.23   | 130.25 ± 48.06 | 68 ~ 198    |
|                           | 5-60s        | 153.73 ± 104.59 | 120.09 ± 57.43 | 42 ~ 212    |
|                           | Before (all) | 93.29 ± 10.92   | 92.00 ± 8.50   | 74 ~ 136    |
|                           | 2-30s        | 90.14 ± 5.44    | 89.50 ± 9.69   | 74 ~ 107    |
|                           | 40s          | 91.00 ± 4.40    | 94.75 ± 6.30   | 84 ~ 102    |
|                           | 5-60s        | 96.55 ± 14.14   | 93.27 ± 6.93   | 82 ~ 136    |
| Creatinine (mg/dL)        | After (all)  | 95.96 ± 10.45   | 94.46 ± 9.72   | 63 ~ 112    |
|                           | 2-30s        | 91.57 ± 10.38   | 90.30 ± 11.12  | 63 ~ 106    |
|                           | 40s          | 96.67 ± 7.13    | 96.75 ± 5.93   | 82 ~ 103    |
|                           | 5-60s        | 98.36 ± 10.67   | 97.82 ± 7.21   | 82 ~ 112    |
|                           | Before (all) | 0.77 ± 0.13     | 0.81 ± 0.14    | 0.59 ~ 1.09 |
|                           | 2-30s        | 0.65 ± 0.08     | 0.80 ± 0.12    | 0.59 ~ 1.09 |
|                           | 40s          | 0.82 ± 0.05     | 0.79 ± 0.06    | 0.70 ~ 0.85 |
|                           | 5-60s        | 0.84 ± 0.11     | 0.84 ± 0.17    | 0.70 ~ 1.04 |
| BUN (mg/dL)               | After (all)  | 0.81 ± 0.10     | 0.82 ± 0.13    | 0.59 ~ 1.10 |
|                           | 2-30s        | 0.71 ± 0.06     | 0.83 ± 0.12    | 0.59 ~ 1.10 |
|                           | 40s          | 0.82 ± 0.05     | 0.78 ± 0.06    | 0.72 ~ 0.87 |
|                           | 5-60s        | 0.87 ± 0.09     | 0.85 ± 0.16    | 0.70 ~ 0.99 |
|                           | Before (all) | 11.83 ± 3.39    | 12.30 ± 3.64   | 5.5 ~ 21.8  |
|                           | 2-30s        | 10.44 ± 2.01    | 10.50 ± 3.20   | 5.5 ~ 14.6  |
|                           | 40s          | 11.70 ± 3.13    | 13.00 ± 2.00   | 7.3 ~ 16.9  |
|                           | 5-60s        | 12.78 ± 3.45    | 13.67 ± 3.64   | 7.6 ~ 21.8  |
|                           | After (all)  | 11.66 ± 2.53    | 12.63 ± 3.84   | 6.0 ~ 22.5  |
|                           | 2-30s        | 11.56 ± 2.27    | 10.85 ± 3.64   | 6.0 ~ 18.6  |
|                           | 40s          | 9.95 ± 1.67     | 11.42 ± 1.96   | 7.7 ~ 14.7  |
|                           | 5-60s        | 12.66 ± 2.46    | 14.69 ± 3.34   | 9.7 ~ 22.5  |

Data are expressed as mean ± SD. A/G, albumin to globulin ratio; AST, aspartate aminotransferase; ALT, alanine aminotransferase; ALP, alkaline phosphatase; γ-GTP, gamma-glutamyl transpeptidase; BUN, blood urea nitrogen.

**Table S2.** Hematological test results of subjects after 4 weeks of JGT administrations.

| Variables                 | Treatment | JGT               | Placebo           | Reference range |
|---------------------------|-----------|-------------------|-------------------|-----------------|
| WBC (102/ $\mu$ L)        | Before    | 60.33 $\pm$ 16.18 | 58.04 $\pm$ 14.07 | 40 ~ 103        |
|                           | After     | 56.58 $\pm$ 12.11 | 58.40 $\pm$ 15.54 | 31~ 95          |
| Segment (%)               | Before    | 55.40 $\pm$ 8.17  | 55.13 $\pm$ 7.05  | 33.5 ~ 66.9     |
|                           | After     | 52.72 $\pm$ 8.12  | 55.93 $\pm$ 9.16  | 33.4 ~ 71.8     |
| Monocyte (%)              | Before    | 4.66 $\pm$ 2.04   | 4.84 $\pm$ 2.37   | 1.4 ~ 9.4       |
|                           | After     | 5.08 $\pm$ 2.28   | 4.66 $\pm$ 2.52   | 2.0 ~ 8.7       |
| Lymphocyte (%)            | Before    | 41.61 $\pm$ 7.20  | 38.56 $\pm$ 5.72  | 30.9 ~ 54.4     |
|                           | After     | 40.56 $\pm$ 6.68  | 38.23 $\pm$ 5.43  | 27.0 ~ 56.6     |
| Hemoglobin (104/ $\mu$ L) | Before    | 12.94 $\pm$ 1.65  | 12.95 $\pm$ 1.37  | 9.4 ~ 13.9      |
|                           | After     | 12.90 $\pm$ 1.57  | 13.0 $\pm$ 1.41   | 9.3 ~ 13.8      |
| RBC                       | Before    | 402.6 $\pm$ 34.0  | 404.4 $\pm$ 32.4  | 373 ~ 492       |
|                           | After     | 385.2 $\pm$ 33.7  | 399.8 $\pm$ 40.6  | 378 ~ 491       |
| Hematocrit (%)            | Before    | 37.59 $\pm$ 7.53  | 38.83 $\pm$ 3.40  | 29.3 ~ 44.4     |
|                           | After     | 37.75 $\pm$ 7.51  | 38.80 $\pm$ 3.67  | 25.7 ~ 44.7     |
| ESR (mm/hr)               | Before    | 11.77 $\pm$ 9.61  | 11.64 $\pm$ 8.32  | 3 ~ 28          |
|                           | After     | 11.33 $\pm$ 7.80  | 13.40 $\pm$ 9.61  | 5 ~ 23          |
| Platelets (104/ $\mu$ L)  | Before    | 23.27 $\pm$ 5.46  | 23.87 $\pm$ 5.11  | 19.3 ~ 31.1     |
|                           | After     | 23.99 $\pm$ 5.11  | 24.00 $\pm$ 5.71  | 17.8 ~ 33.6     |
| MCV (fl)                  | Before    | 86.95 $\pm$ 15.86 | 89.57 $\pm$ 7.30  | 66.3 ~ 98.0     |
|                           | After     | 87.27 $\pm$ 14.76 | 89.52 $\pm$ 6.99  | 66.0 ~ 102.0    |
| MCH (%)                   | Before    | 28.93 $\pm$ 5.49  | 29.88 $\pm$ 2.76  | 20.0 ~ 34.7     |
|                           | After     | 29.16 $\pm$ 5.19  | 33.32 $\pm$ 0.91  | 20.7 ~ 34.2     |
| RDW (%)                   | Before    | 12.72 $\pm$ 2.64  | 12.56 $\pm$ 1.33  | 10.6 ~ 16.6     |
|                           | After     | 12.13 $\pm$ 2.45  | 12.72 $\pm$ 1.63  | 10.0 ~ 16.5     |

Data are expressed as mean  $\pm$  SD. WBC, white blood cells; RBC, red blood cells; ESR, erythrocyte sedimentation rate; MCV, mean corpuscular volume; MCH, mean corpuscular hemoglobin; RDW, red cell distribution width.

**Table S3.** Composition of JGT

| Herbal name              | Scientific name                                                | Part of use | Place of origin      | Amount (g) |
|--------------------------|----------------------------------------------------------------|-------------|----------------------|------------|
| Gastrodiae Rhizoma       | <i>Gastrodia elata</i> Bl.                                     | Rhizoma     | S. Korea (Muju)      | 1.2        |
| Adenophorae Radix        | <i>Adenophora triphylla</i> var. <i>japonica</i> Hara          | Root        | S. Korea (Jinan)     | 1.2        |
| Hoelen                   | <i>Poria cocos</i> Wolf                                        | Mushroom    | S. Korea (Bonghwa)   | 0.5        |
| Atractylodis Rhizoma     | <i>Atractylodes japonica</i> Koidz.                            | Root        | S. Korea (Bonghwa)   | 0.5        |
| Citrus Pericarpium       | <i>Citrus unshiu</i> Markovich                                 | Peel        | S. Korea (Seoguiipo) | 0.4        |
| Pinelliae Rhizoma        | <i>Pinellia ternata</i> (Thunb.) Breitenbach                   | Rhizoma     | S. Korea (Seoguiipo) | 0.4        |
| Paeoniae Radix Alba      | <i>Paeonia lactiflora</i> Pall.                                | Root        | S. Korea (Andong)    | 0.4        |
| Rehmanniae Radix         | <i>Rehmannia glutinosa</i> Liboschitz                          | Root        | S. Korea (Andong)    | 0.4        |
| Angelicae Gigantis Radix | <i>Angelica gigas</i> Nakai                                    | Root        | S. Korea (Yeongju)   | 0.4        |
| Liriope Tuber            | <i>Liriope platyphylla</i> Wang et Tang                        | Root        | S. Korea (Milyang)   | 0.4        |
| Cnidii Rhizoma           | <i>Cnidium officinale</i> Makino                               | Root        | S. Korea (Bonghwa)   | 0.4        |
| Jujube Fructus           | <i>Zizyphus jujuba</i> Miller var. <i>inermis</i> Rehder       | Fruits      | S. Korea (Boeun)     | 0.4        |
| Zingiberis Rhizoma       | <i>Zingiber officinale</i> Rosc.                               | Rhizoma     | S. Korea (Seosan)    | 0.4        |
| Schizonepetae Spica      | <i>Schizonepeta tenuifolia</i> Briquet                         | Herba       | S. Korea (Bonghwa)   | 0.4        |
| Saposhnikoviae Radix     | <i>Saposhnikovia divaricata</i> Schischkin                     | Root        | S. Korea (Yeongju)   | 0.4        |
| Polygalae Radix          | <i>Polygala tenuifolia</i> Willd.                              | Root        | China (Yunnan)       | 0.1        |
| Glycyrrhizae Radix       | <i>Glycyrrhiza uralensis</i> Fisch.                            | Root        | China (Neimenggu)    | 0.1        |
| Menthae Herba            | <i>Mentha arvensis</i> Linne var. <i>piperascens</i> Malinvaud | Leaf        | S. Korea (Jecheon)   | 0.01       |
| Total                    |                                                                |             |                      | 8.0        |

**Table S4.** Retention time, linear range, regression equation, correlation coefficient, and contents of seven marker compounds from JGT

| Chemical constructions                                                             | Compounds           | UV (nm) | Retention time (min) | Linear range (µg/mL) | Regression equation (y=ax+b) | Correlation coefficient (r <sup>2</sup> ) | Contents Mean±SD (µg /mg) |
|------------------------------------------------------------------------------------|---------------------|---------|----------------------|----------------------|------------------------------|-------------------------------------------|---------------------------|
| 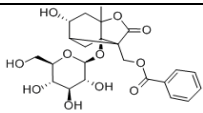  | Albiflorin          | 230     | 14.3                 | 2.0~150              | $y = 10.0540 x + 16.169158$  | 0.999                                     | 2.0018 ± 0.0402           |
|   | Paeoniflorin        | 230     | 15.8                 | 2.0~150              | $y = 15.0484 x + 11.0123$    | 0.999                                     | 92.4079 ± 0.3724          |
|   | Nodakenin           | 330     | 23.7                 | 1.0~75.0             | $y = 55.2948 x + 70.4863$    | 0.999                                     | 0.1465 ± 0.0063           |
|   | Hesperidin          | 280     | 26.9                 | 2.0~150              | $y = 17.6242 x + 45.6974$    | 0.999                                     | 1.1832 ± 0.0981           |
|   | Liquirtigenin       | 280     | 33.4                 | 1.0~75.0             | $y = 37.368 x + 44.9646$     | 0.999                                     | 1.0409 ± 0.0544           |
|   | Glycyrrhizinic acid | 254     | 45.3                 | 2.0~150              | $y = 5.7376 x + 8.2351$      | 0.999                                     | 1.1281 ± 0.0739           |
|  | Decursin            | 330     | 50.4                 | 1.0~75.0             | $y = 42.7344 x + 16.0783$    | 1.000                                     | 0.0170 ± 0.0009           |
